# Supplementary material for: Sulfur amino acid supplementation displays therapeutic potential in a C. elegans model of Duchenne muscular dystrophy
Source: PubMed Central journal article supplement (PMC9668843; doi:10.1038/s42003-022-04212-z), 2022-11-16
Supplement: 42003_2022_4212_MOESM2_ESM.pdf [file 42003_2022_4212_MOESM2_ESM.pdf]

## Description of Additional Supplementary Files

**File name:** Supplementary Data 1

**Description:** Data used for Figures 1 and 2 – H<sub>2</sub>S levels

**File name:** Supplementary Data 2

**Description:** Data used for Figure 1 qPCR

**File name:** Supplementary Data 3

**Description:** Data used for Figure 2 swim assays

**File name:** Supplementary Data 4

**Description:** Data used for Figure 3 lost nuclei

**File name:** Supplementary Data 5

**Description:** Data used for Figure 4 GFP analysis

**File name:** Supplementary Data 6

**Description:** Data used for Figure 5 mitochondrial membrane

**File name:** Supplementary Data 7

**Description:** Data used for Figure 6 mitoSox

**File name:** Supplementary Data 8

**Description:** Data used for Figure 7 Calcium levels

**File name:** Supplementary Data 9

**Description:** Data used for Figure 7 Levamisole sensitivity

**File name:** Supplementary Data 10

**Description:** Data used for Figure 8
